# Supplementary material for: Spin and charge interactions between nanographene host and ferrocene
Source: publisher site journal article supplement (doi:10.3762/bjoc.20.89), 2024-05-02
Supplement: Additional file 1 [file 1860-5397-20-89-S1.pdf]

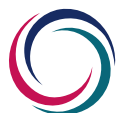

## Supporting Information

for

### **Spin and charge interactions between nanographene host and ferrocene**

Akira Suzuki, Yuya Miyake, Ryoga Shibata and Kazuyuki Takai

*Beilstein J. Org. Chem.* **2024**, *20*, 1011–1019. [doi:10.3762/bjoc.20.89](https://doi.org/10.3762/bjoc.20.89)

## Supporting figures

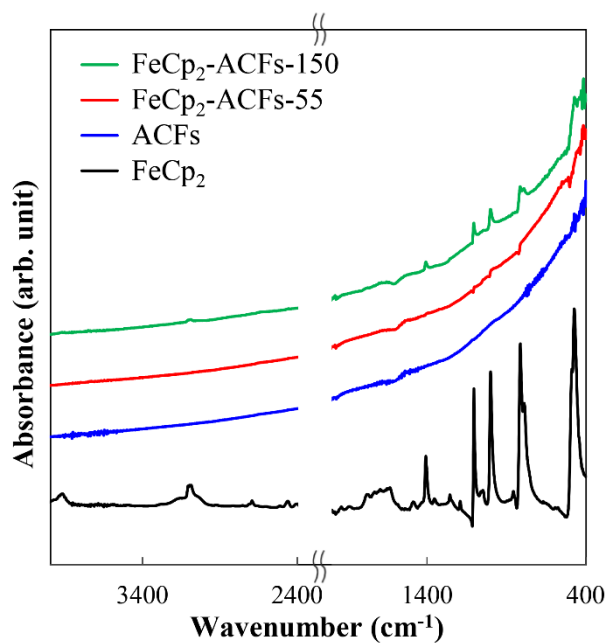

**Figure S1:** The raw infrared spectra for FeCp<sub>2</sub> (black), ACFs (blue), FeCp<sub>2</sub>-ACFs-55 (red) and FeCp<sub>2</sub>-ACFs-150 (blue). The region related to N<sub>2</sub> and CO<sub>2</sub> peaks was hidden, and the base lines of the spectra are shifted vertically from each other for clarify.

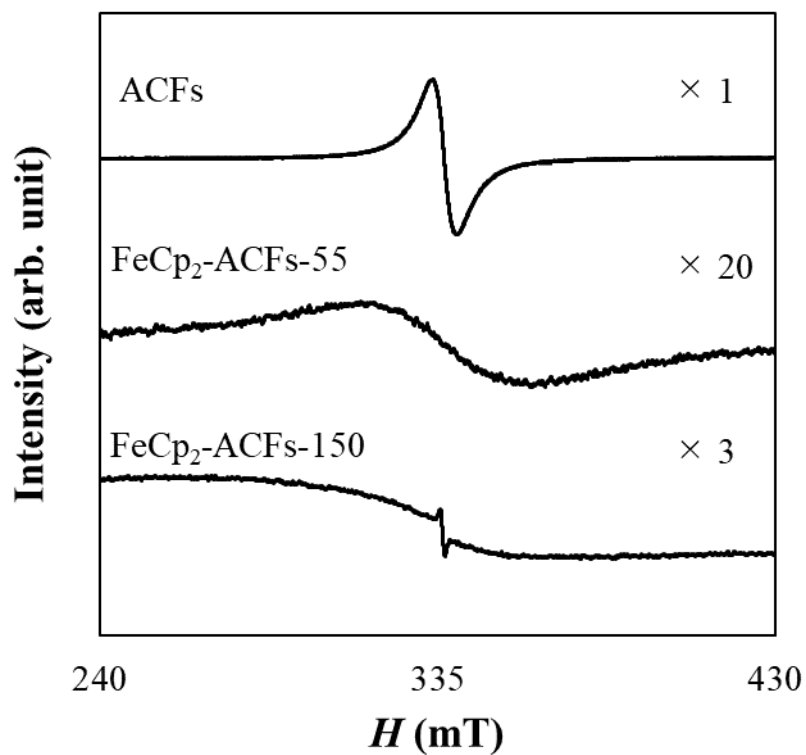

**Figure S2:** ESR spectra for ACFs, FeCp<sub>2</sub>-ACFs-55, and FeCp<sub>2</sub>-ACFs-150 at 1 mW excitation microwave power. The small sharp peak for FeCp<sub>2</sub>-ACFs-150 comes from the impurities in glassware for measurement. The base lines of the spectra are shifted vertically from each other for clarify.
